# Supplementary material for: A neural command circuit for grooming movement control
Source: PubMed Central journal article supplement (PMC4599031; doi:10.7554/elife.08758), 2015-09-07
Supplement: elife08758s001.pdf [file elife08758s001.pdf]

**Supplementary file 1. Enhancer identities used to target different neuronal classes.**

| Line Name       | Enhancer DBD | Enhancer AD | Enhancer GAL4 | Enhancer LexA | Neurons Targeted |
|-----------------|--------------|-------------|---------------|---------------|------------------|
| aJO-spGAL4-1    | R60E02       | R52F12      |               |               | aJO              |
| aJO-spGAL4-2    | R25F11       | R39A11      |               |               | aJO              |
| aJO-spGAL4-3    | R39A11       | R25F11      |               |               | aJO              |
| aJO-spGAL4-4    | R60E02       | R39A11      |               |               | aJO              |
| aJO-spGAL4-5    | R39A11       | R60E02      |               |               | aJO              |
| aBN1-spGAL4-1   | R34C03       | R11B11      |               |               | aBN1             |
| aBN1-spGAL4-2   | R71D01       | R11B11      |               |               | aBN1             |
| aBN1/DN1-spGAL4 | R71D01       | R34C03      |               |               | aBN1, aDN1       |
| aBN2-spGAL4-1   | R26B12       | R24C08      |               |               | aBN2             |
| aBN2-spGAL4-2   | R26B12       | R26A02      |               |               | aBN2             |
| aDN1-spGAL4-1   | R71D01       | R18C11      |               |               | aDN1             |
| aDN2-spGAL4-2   | R18C11       | R76F12      |               |               | aDN2             |
| aDN2-spGAL4-3   | R18C11       | R70H02      |               |               | aDN2             |
| aDN2-spGAL4-4   | R76F12       | R70H02      |               |               | aDN2             |
| aJO-GAL4-1      |              |             | R60E02        |               | aJO              |
| aJO-GAL4-2      |              |             | R27H08        |               | aJO              |
| aDN-GAL4        |              |             | R18C11        |               | aDN              |
| aJO-LexA        |              |             |               | R27H08        | aJO              |
| aBN2-LexA       |              |             |               | R26B12        | aBN2             |
| aDN-LexA        |              |             |               | R18C11        | aDN              |
