# Supplementary material for: A neural command circuit for grooming movement control
Source: PubMed Central journal article supplement (PMC4599031; doi:10.7554/elife.08758), 2015-09-07
Supplement: elife08758s002.pdf [file elife08758s002.pdf]

**Supplementary file 2. Stimulus conditions used for the experiment shown in Figure 6.**

| Tested neuronal pairs       | Red light intensity ( $\mu\text{W}/\text{mm}^2$ )                                                | Number of pulses delivered                 | Runs / number of flies tested                                        |
|-----------------------------|--------------------------------------------------------------------------------------------------|--------------------------------------------|----------------------------------------------------------------------|
| aJO to aBN1                 | ~50                                                                                              | 50                                         | 10 / 3                                                               |
| aJO to aBN2                 | ~50 to 290                                                                                       | 10                                         | 6 / 3                                                                |
| aJO to aDN1                 | ~ 290 to 800                                                                                     | 20                                         | 9 / 3                                                                |
| aJO to aDN2                 | ~800                                                                                             | 100 to 200                                 | 14 / 4                                                               |
| aBN1 to aDN                 | ~50                                                                                              | 5 to 20                                    | pre-drug = 13 / 5<br>drug = 24                                       |
| aBN1 to aBN2                | ~50                                                                                              | 10 to 50                                   | pre-drug = 10 / 3<br>drug = 11                                       |
| aBN2 to aBN1                | ~290<br>~800                                                                                     | 50<br>20 and 50                            | pre-drug = 12 / 5<br>drug = 21                                       |
| aBN2 to aDN1                | ~290<br>~50                                                                                      | 20 to 30<br>20                             | pre-drug = 13 / 4<br>drug = 19                                       |
| aBN2 to aDN2                | <i>Mecamylamine:</i><br>~ 290<br>~ 500<br>~ 800<br><br><i>Picrotoxin:</i><br>~50<br>~50<br>~ 290 | 15 to 30<br>20<br>50<br><br>20<br>50<br>20 | pre-drug = 16 / 5<br>drug = 21<br><br>pre-drug = 10 / 4<br>drug = 10 |
| pBPLexAp65U control to aBN2 | ~1000                                                                                            | 50                                         | 8 / 3                                                                |
| pBPLexAp65U control to aDN2 | ~800-1000                                                                                        | 50                                         | 11 / 5                                                               |
