# Supplementary material for: A neural command circuit for grooming movement control
Source: PubMed Central journal article supplement (PMC4599031; doi:10.7554/elife.08758), 2015-09-07
Supplement: elife08758s003.pdf [file elife08758s003.pdf]

### Supplementary file 3. Stocks used in this study.

| Fly stock                                                                                                                                           | References                                                                | Figure                                                                                                                                                                                                                                                            |
|-----------------------------------------------------------------------------------------------------------------------------------------------------|---------------------------------------------------------------------------|-------------------------------------------------------------------------------------------------------------------------------------------------------------------------------------------------------------------------------------------------------------------|
| <i>w<sup>1118</sup></i> ; R27H08-LexA (attP40); <i>5XUAS-DSCP-E86tetLC*</i> (pJFRC34, attP2), <i>13xlexAop2-IVS-dTrpA1-WPRE**</i> (JFRC 26, VK0005) | *(Shirangi, Stern, and Truman 2013)<br>**(Mann, Gordon, and Scott 2013)** | <b>Figure 4B</b>                                                                                                                                                                                                                                                  |
| <i>13XLexAop2-IVS-myr-tdTomato**</i> (pJFRC48, attP18); R27H08-LexA (attP40); <i>10XUAS-IVS-myr::GFP*</i> (pJFRC12, su(Hw)attP1)                    | *(Pfeiffer et al. 2010)<br>**(Asahina et al. 2014)                        | <b>Figure 5A-D,</b><br><b>Figure 4 - supplement 2A,B,</b><br><b>Figure 5 - supplement 2A-D</b>                                                                                                                                                                    |
| <i>13XLexAop2-IVS-myr-tdTomato**</i> (pJFRC48, attP18); <i>10XUAS-IVS-myr::GFP*</i> (pJFRC12, su(Hw)attP5); R26B12-LexA (attP2)                     | *(Pfeiffer et al. 2010)<br>**(Asahina et al. 2014)                        | <b>Figure 5E-G,</b><br><b>Figure 4 - supplement 2C,D,</b><br><b>Figure 5 - supplement 2E-G</b>                                                                                                                                                                    |
| <i>13XLexAop2-IVS-myr-tdTomato**</i> (pJFRC48, attP18); <i>10XUAS-IVS-myr::GFP*</i> (pJFRC12, su(Hw)attP5); R18C11-LexA (attP2)                     | *(Pfeiffer et al. 2010)<br>**(Asahina et al. 2014)                        | <b>Figure 5H,</b><br><b>Figure 4 - supplement 2E,F,</b><br><b>Figure 5 - supplement 2H</b>                                                                                                                                                                        |
| <i>w<sup>1118</sup></i> ; R34C03-AD (attP40); <i>10XUAS-IVS-mCD8::GFP*/TM6b</i> (pJFRC2, su(Hw) attP2)                                              | *(Pfeiffer et al. 2010)                                                   | <b>Figure 2H</b>                                                                                                                                                                                                                                                  |
| <i>w<sup>1118</sup></i> ; <i>10XUAS-IVS-mCD8::GFP</i> (pJFRC2, attP2)                                                                               | (Pfeiffer et al. 2010)                                                    | <b>Figure 1C-F,</b><br><b>Figure 2C-F,H,</b><br><b>Figure 3A-D,</b><br><b>Figure 1 - supplement 1B-J,</b><br><b>Figure 1 - supplement 2A-E',</b><br><b>Figure 2 - supplement 1B-H,</b><br><b>Figure 2 - supplement 2A-I,</b><br><b>Figure 4 - supplement 1B-D</b> |
| <i>w<sup>1118</sup></i> ; <i>UAS-dTrpA1</i> (attP16)                                                                                                | (Hamada et al. 2008)                                                      | <b>Figure 1A-B,</b><br><b>Figure 2A-B</b>                                                                                                                                                                                                                         |
| <i>w<sup>1118</sup></i> ; <i>UAS-Kir2.1-GFP</i>                                                                                                     | (Baines et al. 2001)                                                      | <b>Figure 4E</b> (data not shown)                                                                                                                                                                                                                                 |
| <i>w<sup>1118</sup></i> ; <i>UAS-TeTxLC.TNT</i>                                                                                                     | (Sweeney et al. 1995)                                                     | <b>Figure 4E</b><br><b>Figure 4 - supplement 3A-C</b>                                                                                                                                                                                                             |
| <i>20XUAS-CsChrimson-mVenus</i> (attP18)                                                                                                            | (Klapoetke et al. 2014)                                                   | <b>Figure 7C-D,</b><br><b>Figure 6 - supplement 2,</b><br><b>Figure 6 - supplement 3,</b><br><b>Figure 7 - supplement 1A,B</b>                                                                                                                                    |

|                                                                                                                                    |                                                  |                                                                                                                                                                                                                                             |
|------------------------------------------------------------------------------------------------------------------------------------|--------------------------------------------------|---------------------------------------------------------------------------------------------------------------------------------------------------------------------------------------------------------------------------------------------|
| <i>13XLexAop2-CsChrimson-mVenus*</i> (attP18); R24C08-AD (attP40); R26B12-DBD (attP2)                                              | *(Klapoetke et al. 2014)                         | <b>Figure 6B</b>                                                                                                                                                                                                                            |
| <i>13XLexAop2-CsChrimson-mVenus*</i> (attP18); R18C11-AD/CyO (attP40); R71D01-DBD (attP2)                                          | *(Klapoetke et al. 2014)                         | <b>Figure 6C</b>                                                                                                                                                                                                                            |
| <i>13XLexAop2-CsChrimson-mVenus*</i> (attP18); R11B11-AD (attP40); R34C03-DBD (attP2)                                              | *(Klapoetke et al. 2014)                         | <b>Figure 6A</b>                                                                                                                                                                                                                            |
| <i>13XLexAop2-CsChrimson-mVenus*</i> (attP18); R76F12-AD (attP40); R18C11-DBD (attP2)                                              | *(Klapoetke et al. 2014)                         | <b>Figure 6D</b>                                                                                                                                                                                                                            |
| <i>20XUAS-CsChrimson-mVenus*</i> (attP18); <i>13XLexAop2-IVS-p10-GCaMP6s**</i> (pGP-JFRC59, su(Hw)attP5); R26B12-LexA/TM6b (attP2) | *(Klapoetke et al. 2014)<br>**(Chen et al. 2013) | <b>Figure 6F</b>                                                                                                                                                                                                                            |
| <i>w<sup>1118</sup></i> ; <i>20XUAS-IVS-GCaMP6s*</i> (pGP-JFRC7) (attP40); R26B12-LexA/TM6b (attP2)                                | *(Chen et al. 2013)                              | <b>Figure 6G-I</b>                                                                                                                                                                                                                          |
| <i>w<sup>1118</sup></i> ; R27H08-LexA (attP40); <i>20XUAS-IVS-GCaMP6s*</i> (pGP-JFRC7, VK0005)                                     | *(Chen et al. 2013)                              | <b>Figure 6A-D</b>                                                                                                                                                                                                                          |
| <i>20XUAS-CsChrimson-mVenus**</i> (attP18); <i>13XLexAop2-IVS-p10-GCaMP6s*</i> (pGB-JFRC59, su(Hw)attP5); R18C11-LexA              | *(Chen et al. 2013)<br>**(Klapoetke et al. 2014) | <b>Figure 6E</b>                                                                                                                                                                                                                            |
| <i>w<sup>1118</sup></i> ; pBDPLexAp65U* (attP40); <i>20XUAS-IVS-GCaMP6s**</i> (pGP-JFRC7, VK0005)                                  | *(Pfeiffer et al. 2010)<br>**(Chen et al. 2013)  | <b>Figure 4 - supplement 1A</b>                                                                                                                                                                                                             |
| <i>w<sup>1118</sup></i> ; ; pBPGAL4U (attP2)                                                                                       | (Pfeiffer et al. 2010)                           | <b>Figure 4B,E</b><br><b>Figure 1 - supplement 1A,E,</b><br><b>Figure 2 - supplement 1A,</b><br><b>Figure 4 - supplement 3A-C</b>                                                                                                           |
| <i>w<sup>1118</sup></i> ; pBPp65ADZpUw* (attP40) ; pBPZpGAL4DBDUw* (attP2)                                                         | *(Pfeiffer et al. 2010)                          | <b>Figure 1A-B,</b><br><b>Figure 2A-B,</b><br><b>Figure 4B,E,</b><br><b>Figure 1 - supplement 1F,</b><br><b>Figure 5 - supplement 1E,</b><br><b>Figure 6 - supplement 3</b><br><b>(bottom 2 rows),</b><br><b>Figure 7 - supplement 1A,B</b> |
| <i>w<sup>1118</sup></i> ; <i>lexAop-CD4::spGFP11*</i> , R27H08-LexA/CyO (attP40); <i>UAS-CD4::spGFP1-10*</i>                       | *(Gordon and Scott 2009)                         | <b>Figure 5 - supplement 1A-H</b>                                                                                                                                                                                                           |

\*/\*\* Asterisks indicate the transgene associated with the corresponding reference in the second column.

## References

- Asahina, Kenta, Kiichi Watanabe, Brian J Duistermars, Eric Hoopfer, Carlos Roberto González, Eyrún Arna Eyjólfsdóttir, Pietro Perona, and David J Anderson. 2014. "Tachykinin-Expressing Neurons Control Male-Specific Aggressive Arousal in *Drosophila*.." *Cell* 156 (1-2): 221–35. doi:10.1016/j.cell.2013.11.045.
- Baines, R A, J P Uhler, A Thompson, S T Sweeney, and M Bate. 2001. "Altered Electrical Properties in *Drosophila* Neurons Developing Without Synaptic Transmission.." *Journal of Neuroscience* 21 (5): 1523–31.
- Chen, Tsai-Wen, Trevor J Wardill, Yi Sun, Stefan R Pulver, Sabine L Renninger, Amy Baohan, Eric R Schreiter, et al. 2013. "Ultrasensitive Fluorescent Proteins for Imaging Neuronal Activity." *Nature* 499 (7458): 295–300. doi:10.1038/nature12354.
- Gordon, Michael D, and Kristin Scott. 2009. "Motor Control in a *Drosophila* Taste Circuit." *Neuron* 61 (3): 373–84. doi:10.1016/j.neuron.2008.12.033.
- Hamada, Fumika N, Mark Rosenzweig, Kyeongjin Kang, Stefan R Pulver, Alfredo Ghezzi, Timothy J Jegla, and Paul A Garrity. 2008. "An Internal Thermal Sensor Controlling Temperature Preference in *Drosophila*." *Nature* 454 (7201): 217–20. doi:10.1038/nature07001.
- Klapoetke, Nathan C, Yasunobu Murata, Sung Soo Kim, Stefan R Pulver, Amanda Birdsey-Benson, Yong Ku Cho, Tania K Morimoto, et al. 2014. "Independent Optical Excitation of Distinct Neural Populations." *Nature Methods* 11 (3): 338–46. doi:10.1038/nmeth.2836.
- Mann, Kevin, Michael D Gordon, and Kristin Scott. 2013. "A Pair of Interneurons Influences the Choice Between Feeding and Locomotion in *Drosophila*.." *Neuron* 79 (4): 754–65.

doi:10.1016/j.neuron.2013.06.018.

Nern, Aljoscha, Barret D Pfeiffer, and Gerald M Rubin. 2015. "Optimized Tools for Multicolor Stochastic Labeling Reveal Diverse Stereotyped Cell Arrangements in the Fly Visual System." *Proceedings of the National Academy of Sciences* 112 (22): E2967–76.

doi:10.1073/pnas.1506763112.

Pfeiffer, B D, T-T B Ngo, K L Hibbard, C Murphy, A Jenett, J W Truman, and G M Rubin. 2010.

"Refinement of Tools for Targeted Gene Expression in *Drosophila*." *Genetics* 186 (2): 735–55.

doi:10.1534/genetics.110.119917.

Shirangi, Troy R, David L Stern, and James W Truman. 2013. "Motor Control of *Drosophila* Courtship Song." *Cell Reports* 5 (3): 678–86. doi:10.1016/j.celrep.2013.09.039.

Sweeney, S T, K Broadie, J Keane, H Niemann, and C J O'Kane. 1995. "Targeted Expression of Tetanus Toxin Light Chain in *Drosophila* Specifically Eliminates Synaptic Transmission and Causes Behavioral Defects." *Neuron* 14 (2): 341–51.
